# Supplementary material
Source: HighWire-hosted journal article supplement (https://cmaj.ca/highwire/filestream/58892/field_highwire_adjunct_files/4/pressure-lv-5-at.pdf)

Appendix 5 (as supplied by the authors): Intensive blood pressure lowering and cardiovascular outcomes in patients with chronic kidney disease

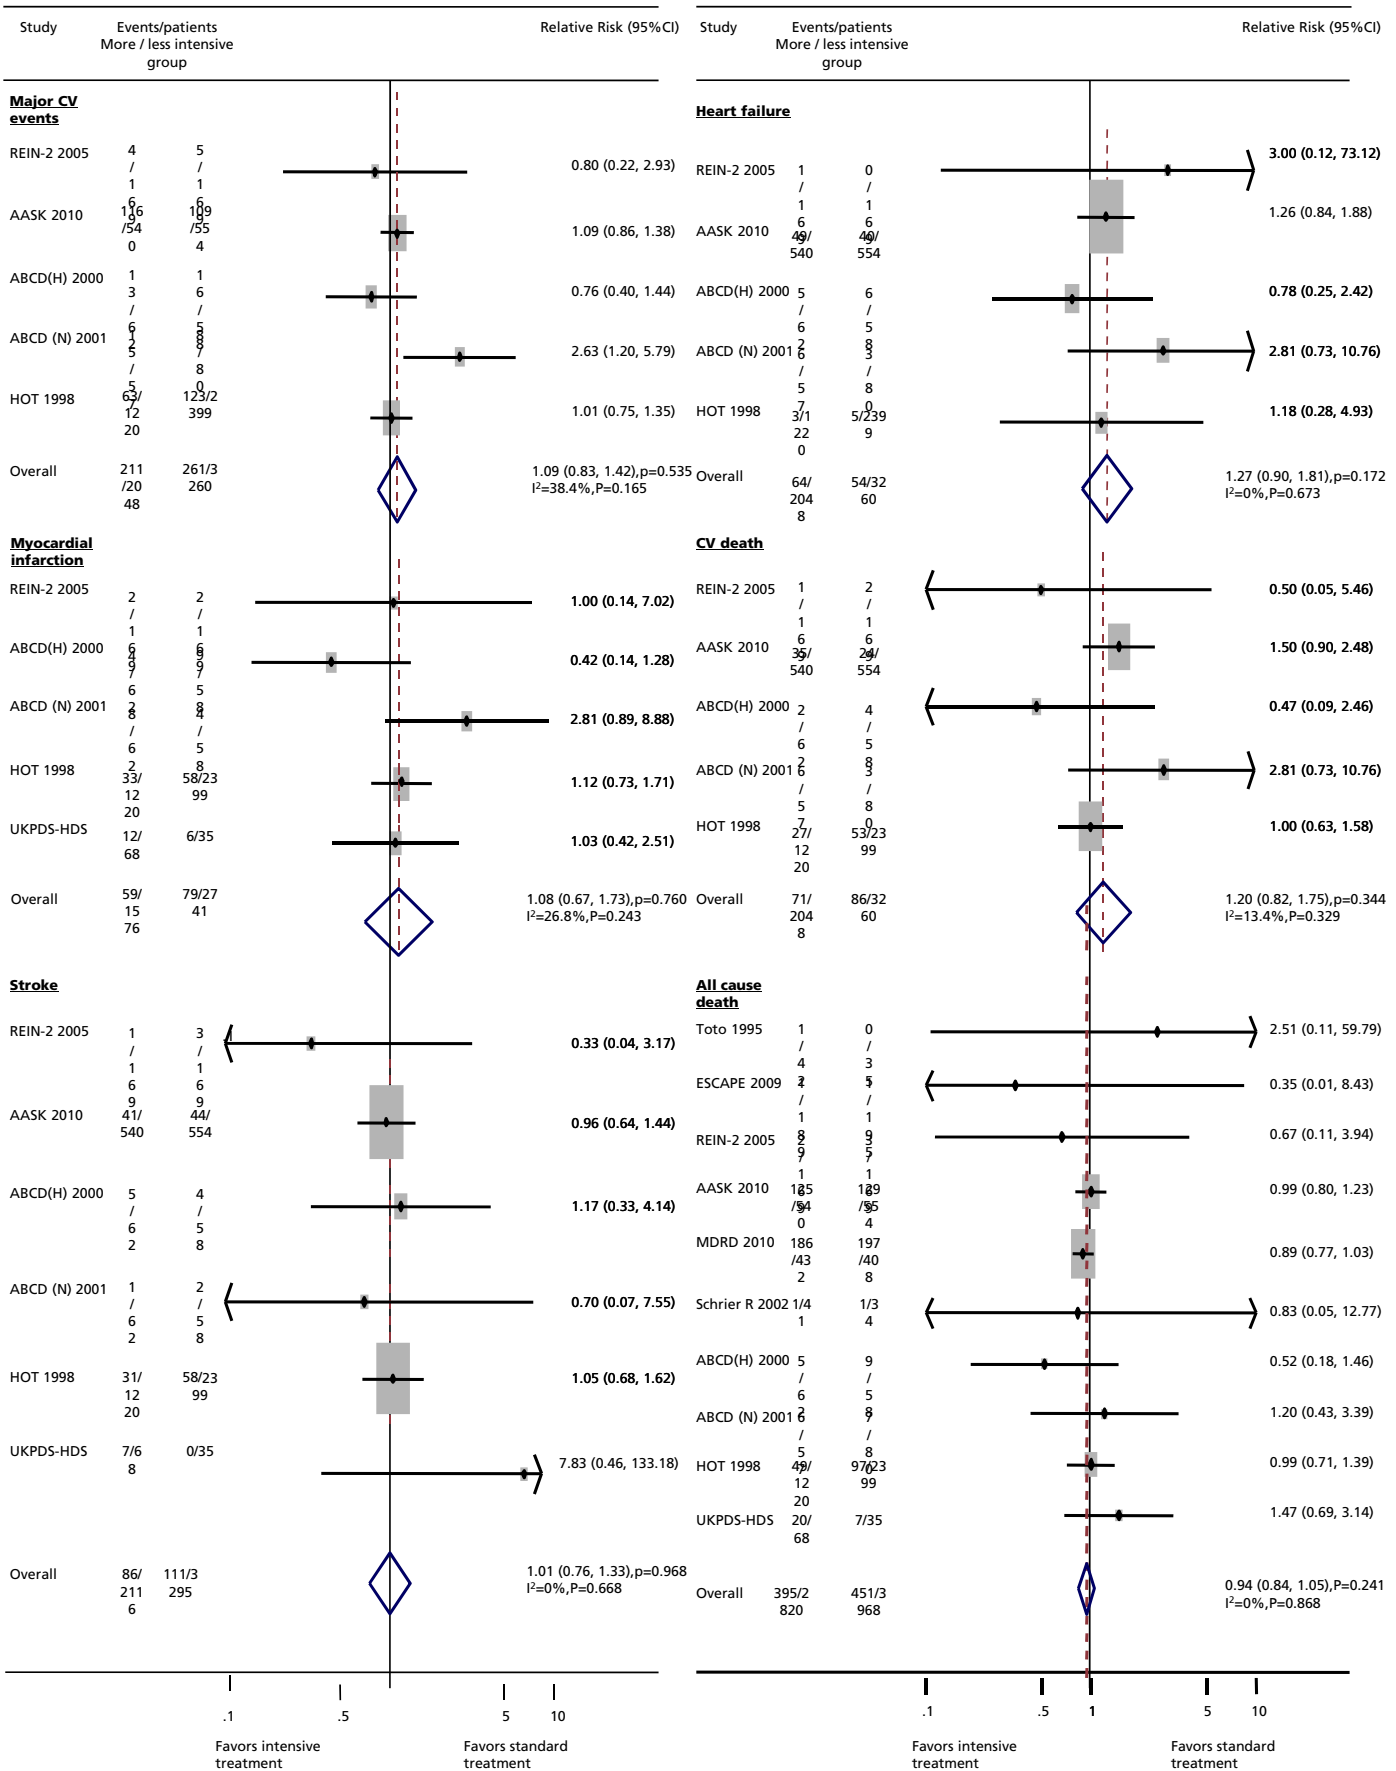

Supplement: pressure-lv-5-at.pdf [file pressure-lv-5-at.pdf]
